# Supplementary material for: Evaluating Communities’ Willingness to Participate in Ecosystem Conservation in Southeast Tibetan Nature Reserves, China
Source: MDPI journal article supplement (doi:10.3390/land11020207), 2022-01-28
Supplement: s1 [file s1]

Archive with 1 entries (1 files):
- land-1533722-supplementary.pdf
